# Supplementary material for: Gut microbiota confers host resistance to obesity by metabolizing dietary polyunsaturated fatty acids
Source: PubMed Central journal article supplement (PMC6728375; doi:10.1038/s41467-019-11978-0), 2019-09-05
Supplement: 41467_2019_11978_MOESM1_ESM.pdf [file 41467_2019_11978_MOESM1_ESM.pdf]

## **SUPPLEMENTARY INFORMATION**

**Gut microbiota confers host resistance to obesity by metabolizing dietary polyunsaturated fatty acids**

Miyamoto *et al.*

\*Corresponding author; Ikuo Kimura

Email: [ikimura@cc.tuat.ac.jp](mailto:ikimura@cc.tuat.ac.jp)

This PDF file includes:

**Supplementary Figures 1–9**

**Supplementary Table 1, 2**

Supplementary Figure 1

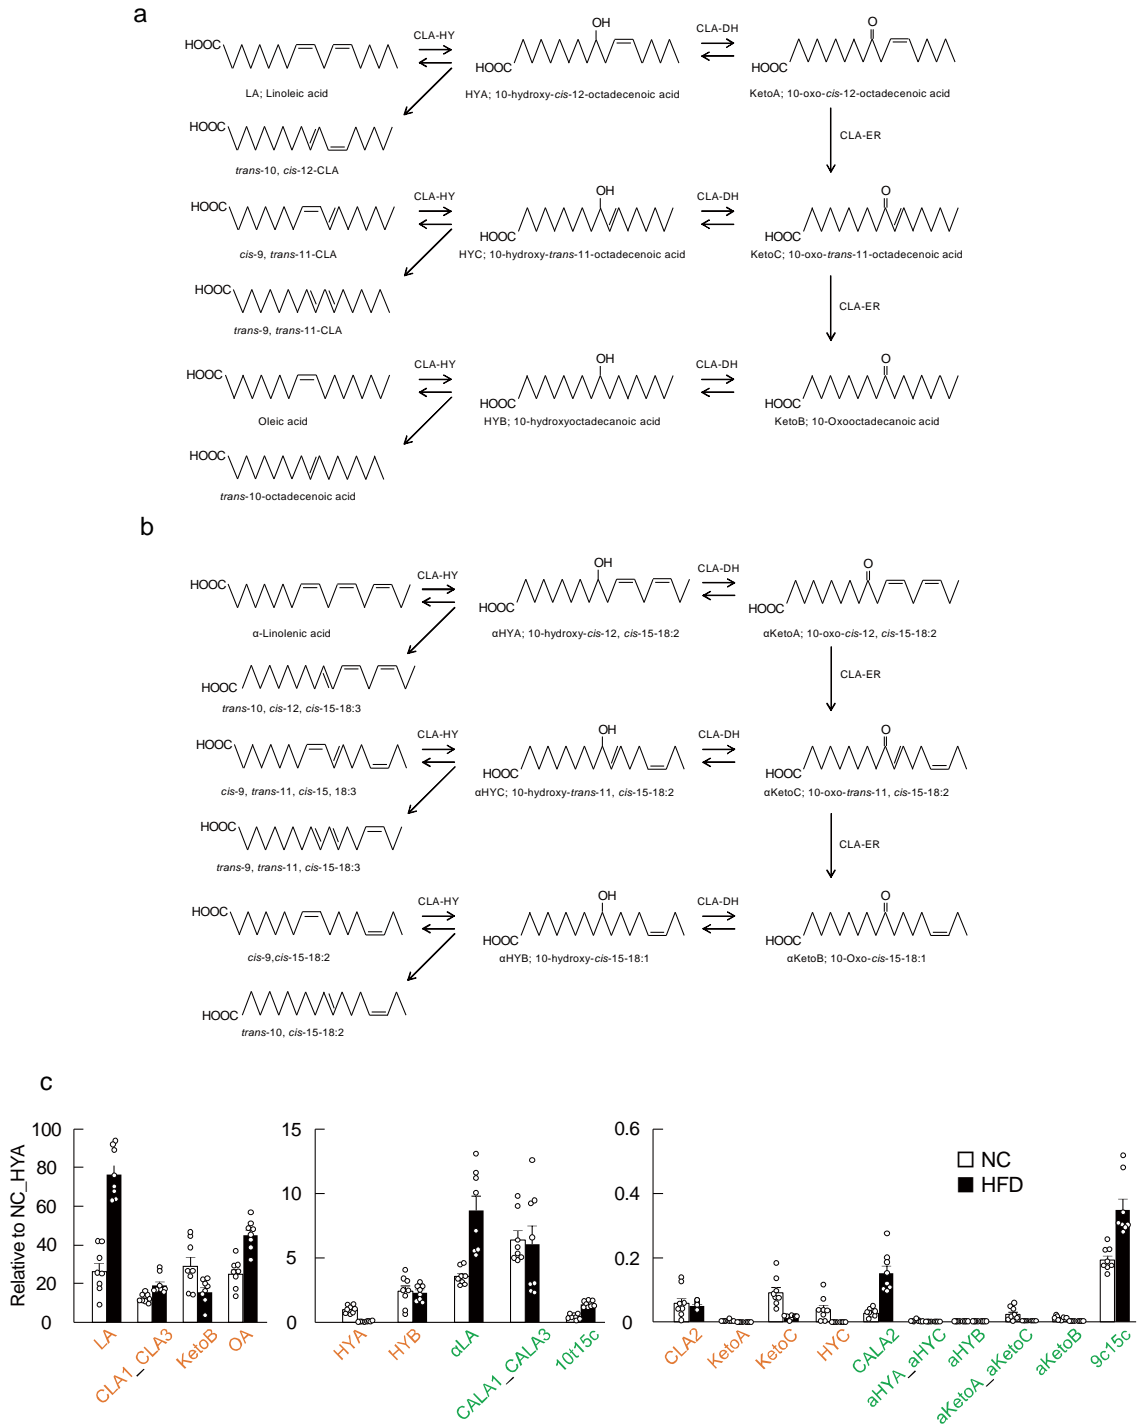

**Supplementary Figure 1. Dietary PUFA-metabolic pathway mediated by gut microbiota.**

Gut microbial metabolites of (a) LA, and (b)  $\alpha$ LA. (c) The relative abundance of gut microbial PUFA metabolites in cecal content ( $n = 8$  per group). Results are presented as means  $\pm$  SE. Open squares represent NC-fed mice and closed squares represent HFD-fed mice over 2 weeks. Source data are provided as a Source Data file.

## Supplementary Figure 2

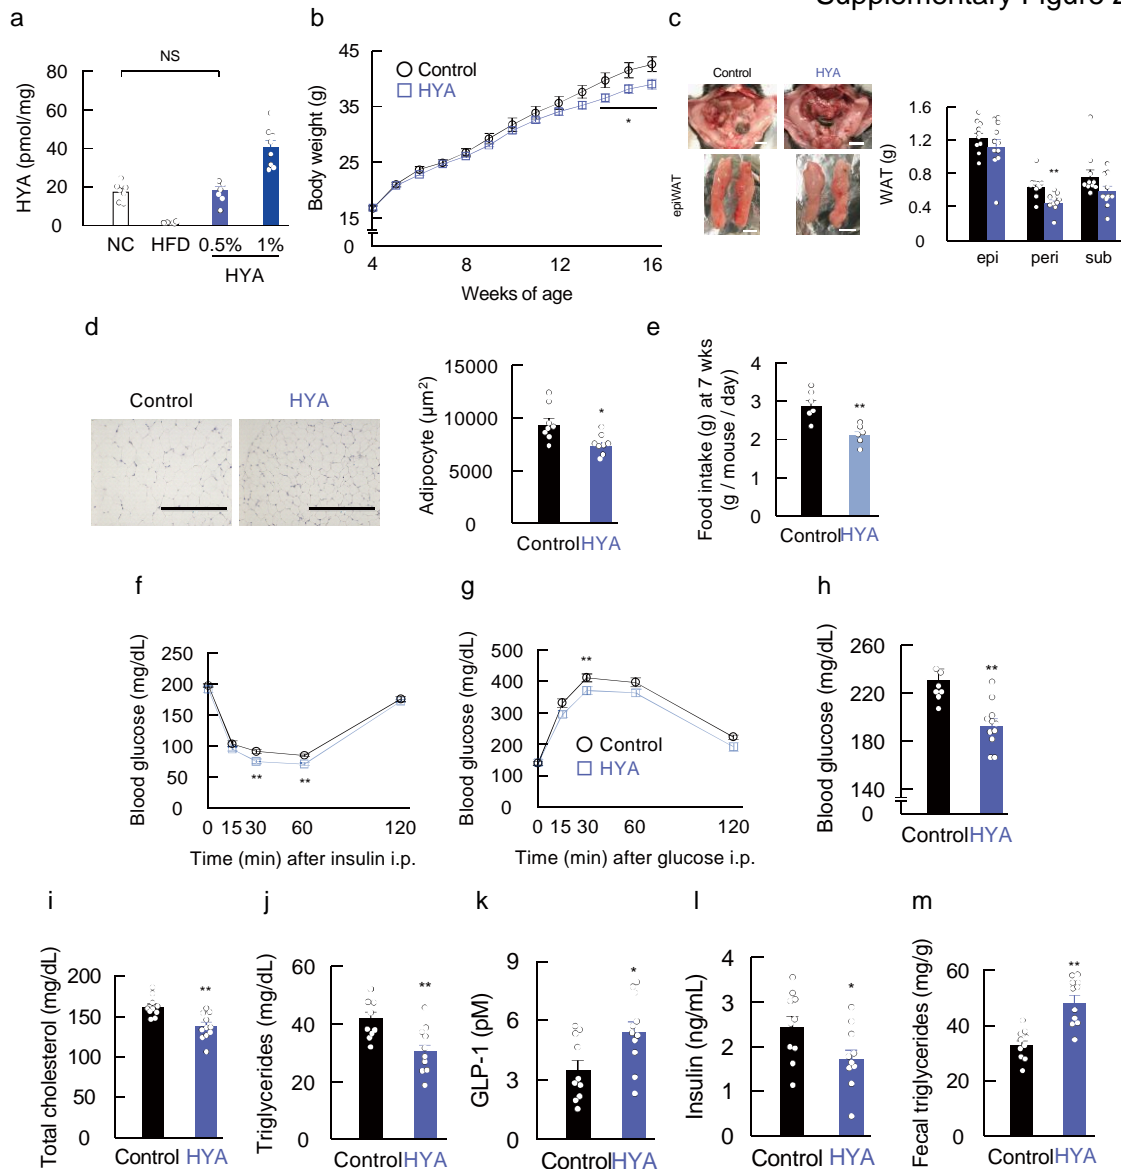

### Supplementary Figure 2. Gut microbial PUFA metabolites improve host metabolic condition.

(a) Quantification of HYA in cecal content ( $n = 8$  per group). Changes in (b) body weight, representative macroscopic appearance, and (c) tissue weights were measured ( $n = 10$  and  $11$  per group). Scale bar; 1 cm. epi, epididymal; peri, perirenal; sub, subcutaneous. (d) Hematoxylin-eosin (H&E)-stained WAT and mean area of adipocytes ( $n = 8$  per group). Scale bar; 400  $\mu\text{m}$ . (e) Daily food intake measured at 7 weeks of age ( $n = 6$  per group). (f) ITT ( $n = 8$  per group) and (g) GTT ( $n = 8$  per group) were analyzed at 14 to 15 weeks of age. (h) Blood glucose, (i) total plasma cholesterol, (j) triglyceride, (k) GLP-1, and (l) insulin levels were measured at the end of the experimental period ( $n = 10$  and  $11$  per group). (m) Fecal triglyceride levels were measured at 16 weeks of age ( $n = 10$  and  $11$  per group). \*\* $P < 0.01$ ; \* $P < 0.05$  vs. control (Student's  $t$  test). Results are presented as means  $\pm$  SE. Source data are provided as a Source Data file.

### Supplementary Figure 3

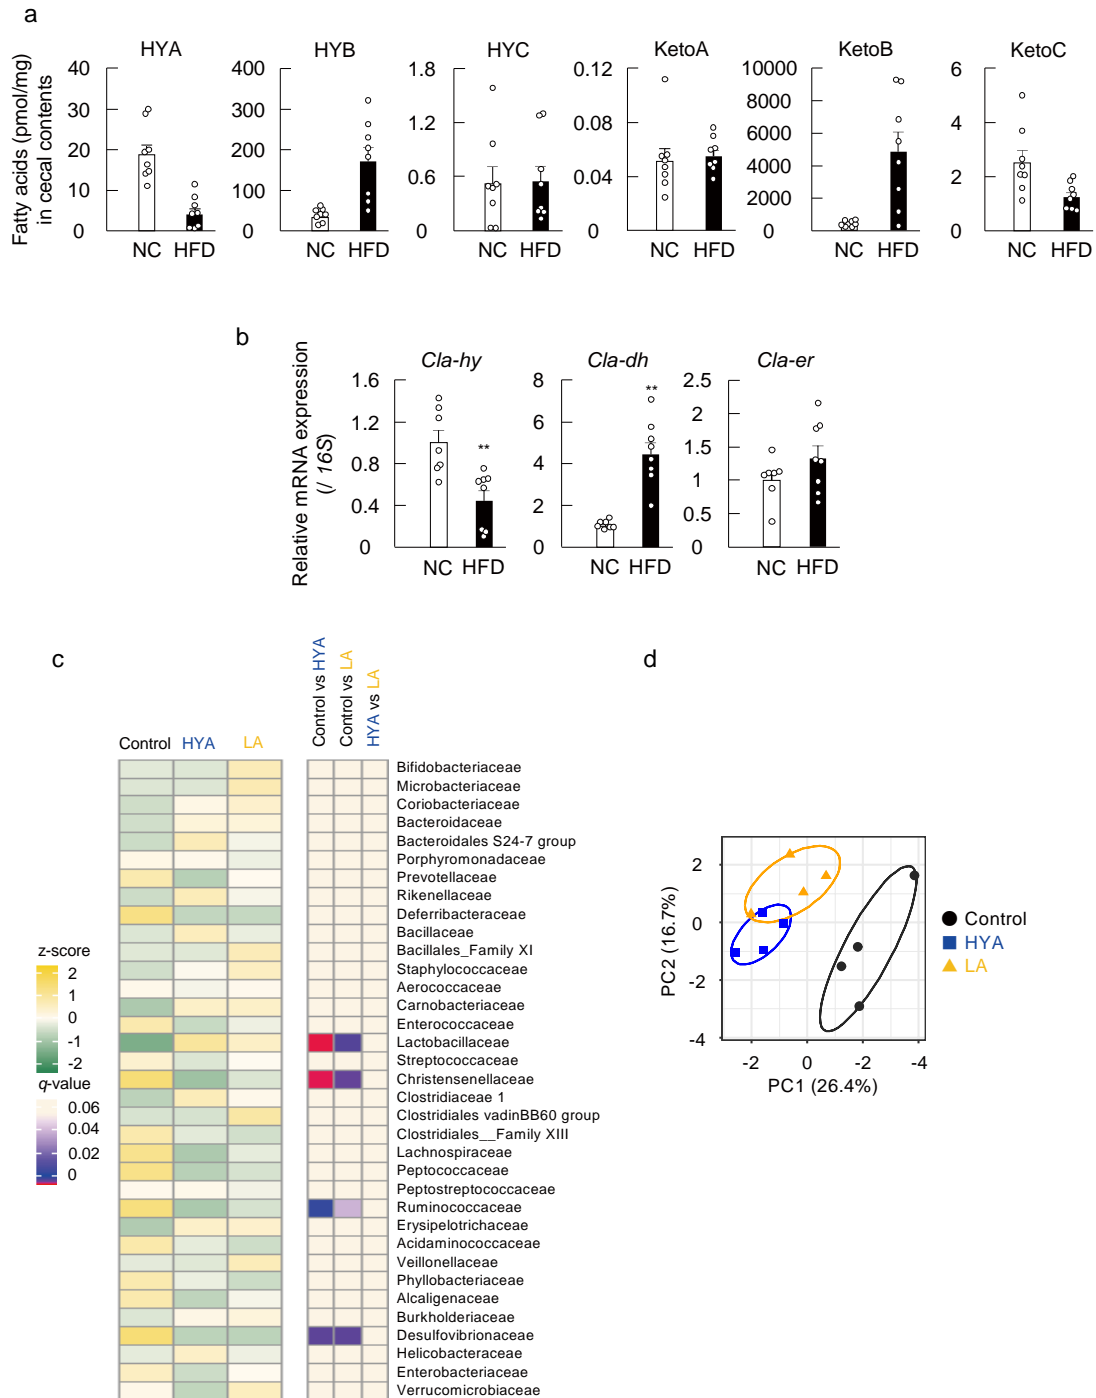

### Supplementary Figure 3. Analysis of gut microbial metabolites and gut microbiota.

(a, b) Analysis of gut microbial metabolites of (a) LA and (b) the relative mRNA expression of metabolite-synthesizing enzymes (*Cla-hy*, *Cla-dh*, and *Cla-er*) (n = 7 and 8 per group). Open squares represent NC-fed mice, and closed squares represent HFD-fed mice over 12 weeks. (c, d) Gut microbial composition determined according to the abundance of bacterial domains at (c) the family level and (d) diversity (n = 4 samples per group). Source data are provided as a Source Data file.

Supplementary Figure 4

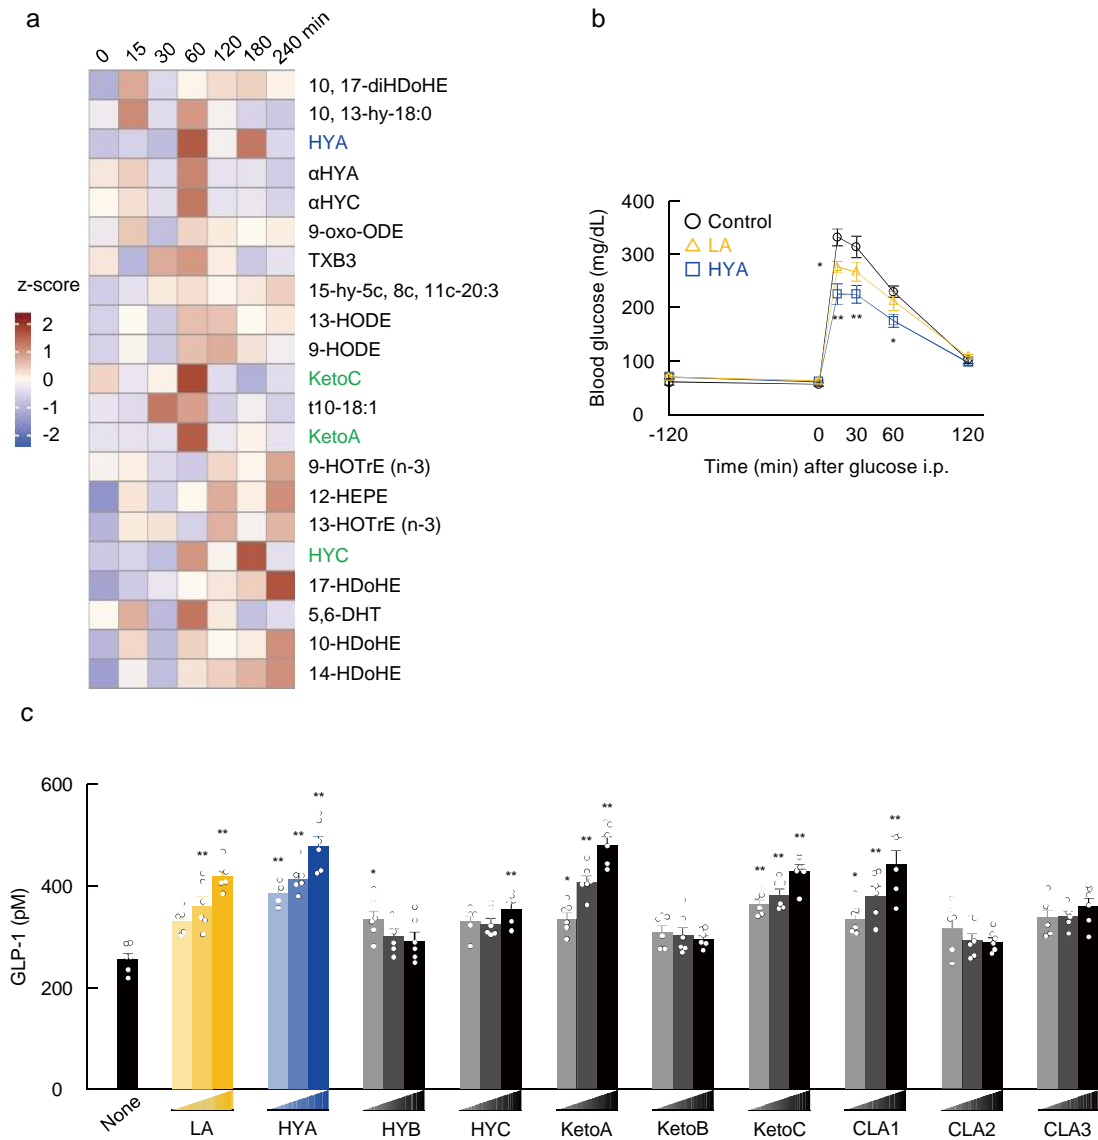

**Supplementary Figure 4. Gut microbial metabolites regulate glucose homeostasis.**

(a) Heat map of gut microbial PUFA metabolites in the ileum after oral administration of HYA ( $n = 3$  tissues). (b) Individual FAs (HYA and LA; 1 g/kg) were administered by gavage, and IPGTT was analyzed ( $n = 8$  animals).  $**P < 0.01$ ;  $*P < 0.05$  vs. control (Tukey–Kramer test). Results are presented as means  $\pm$  SE. (c) GLUTag cells were treated with LA-derived gut microbial metabolites [in a dose-dependent manner (20, 100, and 200  $\mu$ M)], and GLP-1 concentration was measured in culture medium ( $n = 6$  independent cultures from two biological replicates).  $**P < 0.01$ ;  $*P < 0.05$  vs. None (Tukey–Kramer test). Results are presented as means  $\pm$  SE. Source data are provided as a Source Data file.

## Supplementary Figure 5

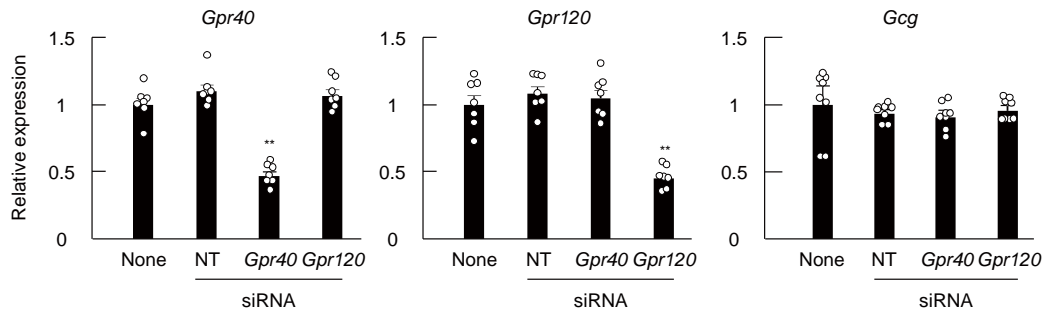

### Supplementary Figure 5. The efficiency of siRNA knockdown STC-1 cells.

(a) mRNA expression of *Gpr40* (left), *Gpr120* (center), and *Gcg* (right) in individual siRNA-transfected STC-1 cells (n = 7 independent cultures for *Gpr40* and *Gpr120* from two biological replicates, n = 8 independent cultures for *Gcg* from two biological replicates). \*\* $P < 0.01$  vs. None (Tukey–Kramer test). Results are presented as means  $\pm$  SE. NT, non-targeting siRNA. Source data are provided as a Source Data file.

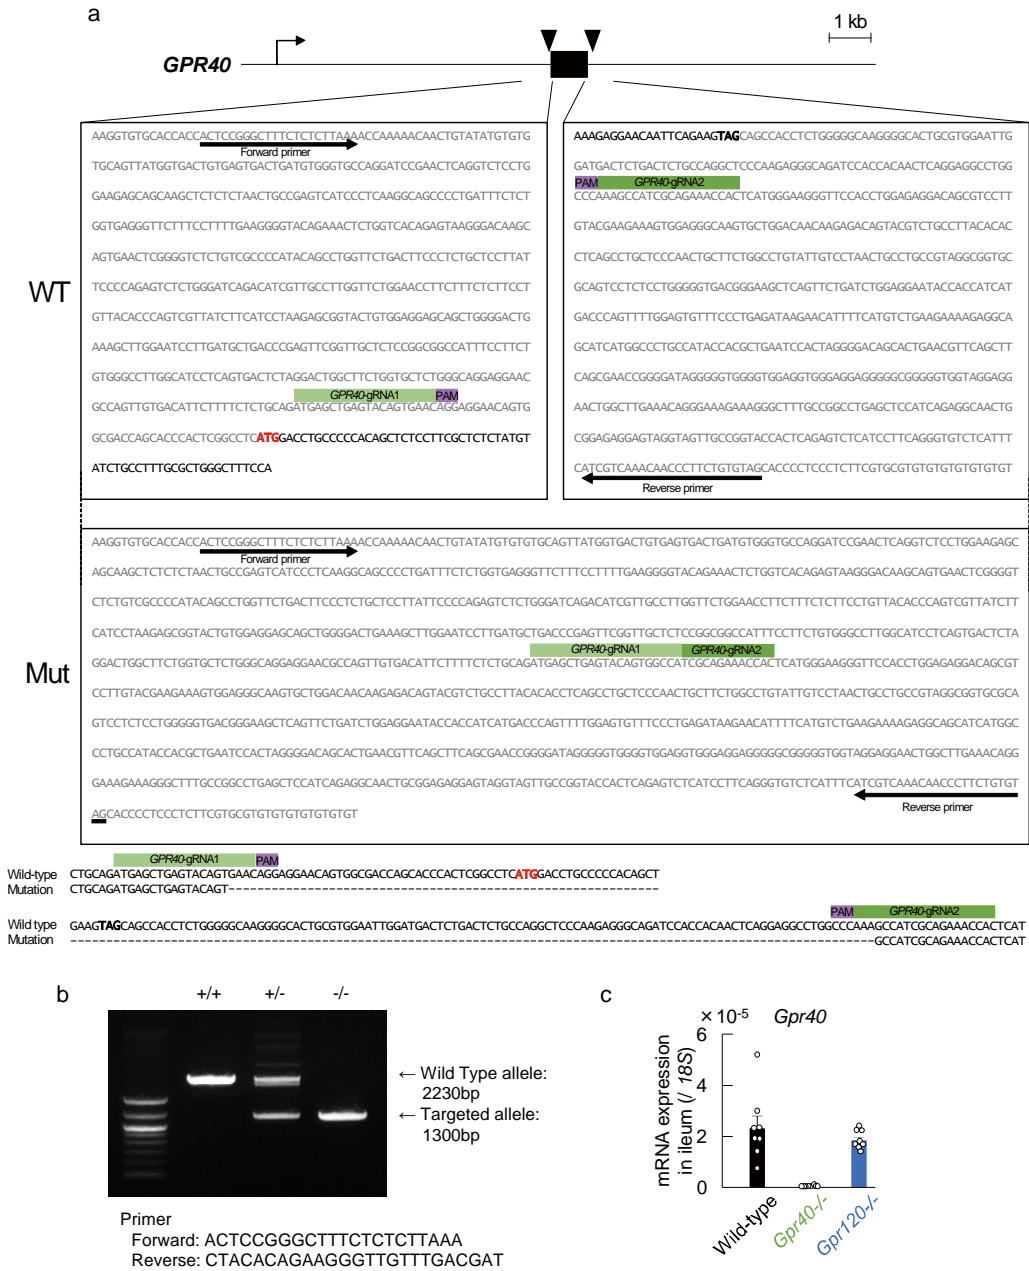

**Supplementary Figure 6. *Gpr40* gene modification.**

(a) Schematic representation of the genomic structures of *Gpr40* genes. *Gpr40*-deficient mice were generated using the CRISPR/Cas9 system in wild-type C57BL/6 zygotes. The coding exon region is shown in a black box. gRNA and PAM sequence are indicated in the green, and purple boxes, respectively. gRNA, guide RNA; PAM, protospacer-adjacent motif. (b) Mouse genotypes were determined by PCR using the indicated primers to detect wild-type and mutant *Gpr40* alleles. (c) mRNA expression of *Gpr40* in the ileum (n = 8 per group). Results are presented as means  $\pm$  SE. Source data are provided as a Source Data file.





Supplementary Figure 8

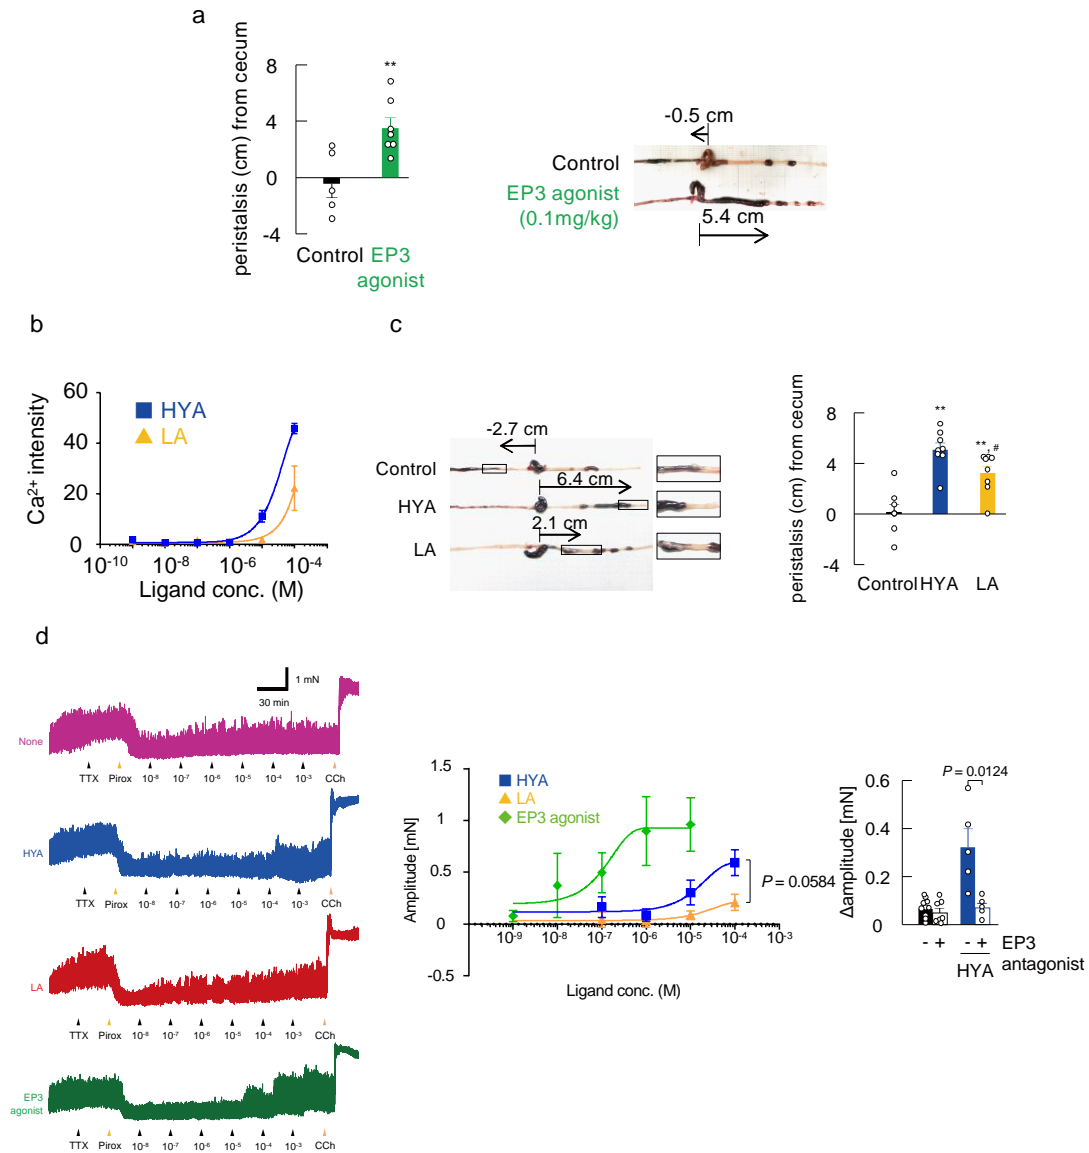

**Supplementary Figure 8. HYA facilitates intestinal peristalsis via EP3 signaling.**

(a) Intestinal peristalsis was assessed 2 h after administration of the EP3 agonist (sulprostone; 0.1 mg/kg) with charcoal by measuring the distance travelled by the charcoal (i.e., the base of the cecum or the start of the colon) (n = 5 and 7 animals per group). (b) Mobilization of [Ca<sup>2+</sup>]<sub>i</sub> induced by LA and HYA in EP3-expressing Chem-1 cells. Data are presented as Ca<sup>2+</sup> intensity (n = 3 independent experiments). (c) Intestinal peristalsis evaluated 2 h after FA administration (1 g/kg) with charcoal by measuring the distance travelled by the charcoal (i.e., the base of the cecum or the start of the colon) (n = 8 animals per group). (d) Representative traces of the isolated intestine in response to the cumulative addition of an HYA, LA, or EP3 agonist in the presence or absence of an EP3 antagonist (n = 10, 7, 5, and 5 samples per group). \*\*P < 0.01; \*P < 0.05 vs. None (Tukey–Kramer test). Results are presented as means ± SE. Source data are provided as a Source Data file.

## Supplementary Figure 9

a

### HYA-producing lactic acid bacteria.

| HYA (+) bacteria              |      |            |            |            |
|-------------------------------|------|------------|------------|------------|
| HYA (+) bacteria              | I.S. | LA (mg)    | HYA (mg)   | HYB (mg)   |
| <i>L. salivarius</i> JCM1044  | 1    | 1.17±0.041 | 3.71±0.518 | 0.05±0.004 |
| <i>L. salivarius</i> JCM1042  | 1    | 1.17±0.088 | 3.58±0.206 | 0.04±0.003 |
| <i>L. salivarius</i> JCM1231  | 1    | 2.45±0.504 | 2.61±0.299 | 0.01±0.001 |
| HYA (-) bacteria              |      |            |            |            |
| HYA (-) bacteria              | I.S. | LA (mg)    | HYA (mg)   | HYB (mg)   |
| <i>L. johnsonii</i> JCM1022   | 1    | 5.7±0.089  | 0.01±0.02  | ND         |
| <i>L. johnsonii</i> JCM8791   | 1    | 4.95±0.254 | 0.25±0.019 | ND         |
| <i>L. acidophilus</i> JCM1229 | 1    | 4.91±0.735 | ND         | ND         |

b

### Colonization of *Lactobacillus*

| <i>Lactobacillus</i> genus<br>( $\times 10^6$ copies / ng DNA) |            |
|----------------------------------------------------------------|------------|
| GF                                                             | ND         |
| HYA (+)                                                        | 5.9±0.827  |
| HYA (-)                                                        | 3.31±0.176 |

c

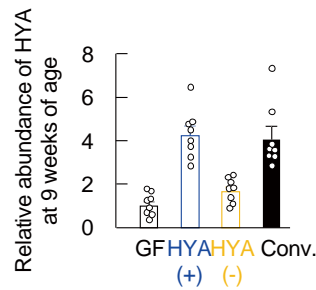

d

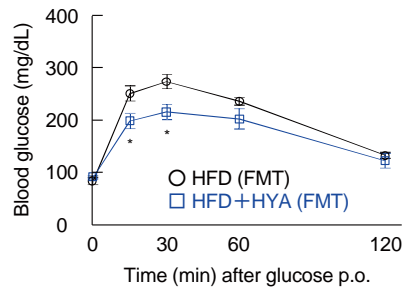

e

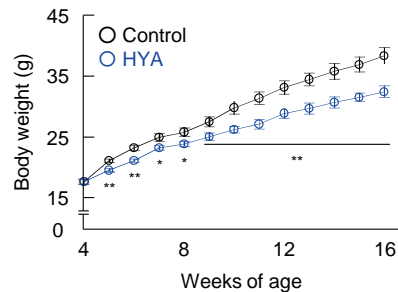

### Supplementary Figure 9. HYA-producing lactic acid bacteria.

(a) Selection of HYA-producing *Lactobacillus* strains (n = 3 bacteria). (b) *Lactobacillus* colonization was detected by qPCR (n = 4 samples per group). (c) The relative abundance of HYA in feces was measured at 9 weeks of age (n = 8 samples per group). \**P* < 0.05 vs. GF mice (Tukey–Kramer test). (d) OGTT in FMT mice. Colonization was undertaken using fecal contents (suspended in sterile PBS) in conventional HFD-induced obese mice (n = 8 and 10 animals per group; 3 mice/pellet, 3 times/week). \**P* < 0.05 vs. HFD-fed gnotobiotic mice (Student's *t* test). (e) Changes in body weight under non-coprophy conditions were measured (n = 9 animals per group). \*\**P* < 0.01; \**P* < 0.05 vs. control (Student's *t* test). Results are presented as means ± SE. Source data are provided as a Source Data file.

Supplementary Table 1

Screening of HYA-producing *Lactobacillus*

|                                                     | I.S. | HYA (mg)    | HYB (mg)    |
|-----------------------------------------------------|------|-------------|-------------|
| <i>L. acidophilus</i> JCM1028                       | 1    | 0.005       | ND          |
| <i>L. acidophilus</i> JCM 1034                      | 1    | 0.004±0.002 | ND          |
| <i>L. acidophilus</i> JCM 1132                      | 1    | 0.023±0.004 | ND          |
| <i>L. acidophilus</i> JCM1229                       | 1    | 0.004±0.002 | ND          |
| <i>L. amylovorus</i> JCM2125                        | 1    | 0.041±0.002 | ND          |
| <i>L. amylovorus</i> JCM5811                        | 1    | 0.018±0.001 | 0.002±0.002 |
| <i>L. antri</i> JCM15950                            | 1    | 0.055±0.004 | ND          |
| <i>L. crispatus</i> JCM8778                         | 1    | 0.002±0.002 | ND          |
| <i>L. gasseri</i> JCM1025                           | 1    | 0.023±0.005 | 0.002±0.002 |
| <i>L. gasseri</i> JCM1130                           | 1    | 0.035±0.003 | ND          |
| <i>L. gasseri</i> JCM1131                           | 1    | 0.034±0.003 | 0.004±0.004 |
| <i>L. johnsonii</i> JCM1022                         | 1    | 0.005       | ND          |
| <i>L. johnsonii</i> JCM8791                         | 1    | 0.011±0.001 | ND          |
| <i>L. johnsonii</i> JCM8794                         | 1    | 0.014±0.001 | ND          |
| <i>L. paracasei</i> subsp. <i>paracasei</i> JCM1109 | 1    | 0.061±0.01  | ND          |
| <i>L. paracasei</i> subsp. <i>paracasei</i> JCM1133 | 1    | 0.055±0.005 | ND          |
| <i>L. reuteri</i> JCM1112                           | 1    | 0.02±0.009  | ND          |
| <i>L. salivarius</i> JCM1040                        | 1    | 0.048±0.013 | 0.002±0.002 |
| <i>L. salivarius</i> JCM1042                        | 1    | 0.389±0.157 | 0.005±0.005 |
| <i>L. salivarius</i> JCM1044                        | 1    | 0.088±0.027 | 0.006±0.006 |
| <i>L. salivarius</i> JCM1045                        | 1    | 0.146±0.022 | ND          |
| <i>L. salivarius</i> JCM1231                        | 1    | 0.322±0.075 | 0.016±0.008 |

**Supplementary Table 1. Selection of HYA-producing *Lactobacillus* strains.**

After bacterial cultivation, HYA and HYB were quantified in culture medium (n = 3 culture supernatants per bacteria). Source data are provided as a Source Data file.

## Supplementary Table 2

Composition of diets.

|                                        | HFD   | 0.5% HYA | 1% HYA | LA    | Normal chow |
|----------------------------------------|-------|----------|--------|-------|-------------|
| Product                                | gm%   | gm%      | gm%    | gm%   | gm%         |
| protein                                | 26    | 25.87    | 25.74  | 25.74 | 25.48       |
| Carbohydrate                           | 26    | 25.87    | 25.74  | 25.74 | 48.92       |
| Fat<br>(Soybean oil and/or Lard)       | 35    | 34.83    | 34.65  | 34.65 | 4.61        |
| LA                                     | 0     | 0        | 0      | 1     | 0           |
| HYA                                    | 0     | 0.5      | 1      | 0     | 0           |
| Fatty acid ratio in total fat          | gm%   | gm%      | gm%    | gm%   | gm%         |
| Saturated                              | 32    | 31.52    | 31.04  | 31.04 | 22.02       |
| Monounsaturated                        | 35.97 | 36.93    | 37.88  | 34.9  | 25.07       |
| Polyunsaturated                        | 32.04 | 31.55    | 31.08  | 34.06 | 52.91       |
| Ingredient of soybean oil and/or Lard  | gm%   | gm%      | gm%    | gm%   | gm%         |
| C10, Capric acid                       | 0.01  | 0.01     | 0.01   | 0.01  | 0           |
| C12, Lauric acid                       | 0.03  | 0.03     | 0.03   | 0.03  | 0           |
| C14, Myristic acid                     | 0.39  | 0.38     | 0.37   | 0.37  | 0.04        |
| C15, pentadecylic acid                 | 0.03  | 0.03     | 0.03   | 0.03  | 0           |
| C16, Palmitic acid                     | 6.87  | 6.73     | 6.59   | 6.59  | 0.75        |
| C16:1, Palmitoleic acid                | 0.47  | 0.46     | 0.45   | 0.45  | 0.06        |
| C17, Margaric acid                     | 0.12  | 0.12     | 0.12   | 0.12  | 0.02        |
| C18, Stearic acid                      | 3.7   | 3.63     | 3.55   | 3.55  | 0.1         |
| C18:1, Oleic acid                      | 11.91 | 11.68    | 11.44  | 11.44 | 0.97        |
| C18:2, Linoleic acid                   | 10.06 | 9.86     | 9.66   | 9.66  | 2.05        |
| C18:3, Linolenic acid                  | 0.72  | 0.7      | 0.69   | 0.69  | 0.15        |
| C20, Arachidic acid                    | 0.06  | 0.05     | 0.05   | 0.05  | 0.02        |
| C20:1                                  | 0.21  | 0.2      | 0.2    | 0.2   | 0.03        |
| C20:2                                  | 0.28  | 0.27     | 0.26   | 0.26  | 0           |
| C20:3                                  | 0.04  | 0.04     | 0.04   | 0.04  | 0           |
| C20:4, Arachidonic acid                | 0.1   | 0.09     | 0.09   | 0.09  | 0           |
| C22:5, Docosapentaenoic acid           | 0.03  | 0.03     | 0.03   | 0.03  | 0           |
| C22:6, Docosahexaenoic acid            | 0     | 0        | 0      | 0     | 0.06        |
| C24:0, Lignoceric acid                 | 0     | 0        | 0      | 0     | 0.01        |
| C24:1, Tetracosenoic acid              | 0     | 0        | 0      | 0     | 0.01        |
| C18:2, Linoleic acid (free fatty acid) | 0     | 0        | 0      | 1     | 0           |
| C18:1 (OH), HYA (free fatty acid)      | 0     | 0.5      | 1      | 0     | 0           |

**Supplementary Table 2. Diet compositions**
